# Supplementary material for: Severity of COVID-19 Infection in ACEI/ARB Users in Two Saudi Public Specialty Hospitals: Retrospective Cohort Study
Source: Research Square preprint supplement (doi:10.21203/rs.3.rs-113824/v1), 2020-12-09
Supplement: Supplementary file 1 [file 4917792fad099ff4e4516918.docx]

**Research Article**

Severity of COVID-19 Infection in ACEI/ARB Users in Two Saudi Public Specialty Hospitals: Retrospective Cohort Study

Ahmed A. Alrashed1, Tahir M. Khan2,3, Noara K. Alhusseini4, Syed Mohammed Basheeruddin Asdaq5*, Mushira Enani6, Bandar Alosaimi7,8, Nada M. Alkhani1, Yahya Mohzari9, Maram M. Alghalbi10, Wafa Alfahad10, Mona A. Alanazi11, Asma S. Albujaidya11, Amal Ben-Akresh10, Malak Almutairi5, Ivo Abraham12,13, Ahmad Alamer13,14

1Pharmaceutical Service Department, Main Hospital, King Fahad Medical City, Riyadh, Saudi Arabia; [fahad@ksmc.med.sa](mailto:fahad@ksmc.med.sa) (A.A.A.); [mhospital1920@gmail.com](mailto:mhospital1920@gmail.com) (N.M.A.)

2The institute of Pharmaceutical Science (IPS) of University of Veterinary and Animal Sciences, Lahore, Pakistan; qualityasdaq@gmail.com

3School of Pharmacy, Monash University, Sunway City, Selangor, Malaysia.

4College of Medicine, Alfaisal University, Riyadh, Saudi Arabia; sasdaq@gmail.com

5College of Pharmacy, AlMaarefa University, Riyadh, Saudi Arabia; [sasdag@mcst.edu.sa](mailto:sasdag@mcst.edu.sa) (S.M.B.A.); [farhana.basheer13@gmail.com](mailto:farhana.basheer13@gmail.com) (M.A.)

6Infectious Disease Section, Medical specialties Department, King Fahad Medical City, Saudi Arabia; emadasdaq@mcst.edu.sa

7Research Center, King Fahad Medical City, Riyadh, Saudi Arabia; basheer_1@rediffmail.com

8College of Medicine, King Fahad Medical City, Riyadh, Saudi Arabia

9Pharmacy Department, Clinical Pharmacy section, King Saud Medical City, Saudi Arabia; [Yali2016@hotmail.com](mailto:Yali2016@hotmail.com)

10Pharmacy Services Department, Prince Sultan Military Medical City, Riyadh, Saudi Arabia; [emadfaiqa@gmail.com](mailto:emadfaiqa@gmail.com) (W.A.); [research.dir@mcst.edu.sa](mailto:research.dir@mcst.edu.sa) (A.B.);malghalbi@gmail.com (M.M.A.)

11Prince Mohammed Bin Abdulaziz Hospital, Riyadh, Saudi Arabia; [abstracts@mcst.edu.sa](mailto:abstracts@mcst.edu.sa) (M.A.A.); [irb@mcst.edu.sa](mailto:irb@mcst.edu.sa) (A.S.A.)

12Department of Pharmacy Practice and Science, College of Pharmacy, University of Arizona, Tucson, Arizona, USA; basheer96@yahoo.com

13 Center for Health Outcomes and PharmacoEconomic Research, University of Arizona, Tucson, Arizona, USA; alamer@pharmacy.arizona.edu

14 Department of Clinical Pharmacy, Prince Sattam Bin Abdulaziz University, Alkharj, Saudi Arabia

***Corresponding author:**

**Dr. Syed Mohammed Basheeruddin Asdaq**

Department of Pharmacology, College of Pharmacy, AlMaarefa University,

Dariyah, Riyadh-11597, KSA, Fax:00966-4903501-3399

E-mail:sasdag@mcst.edu.sa

Submission considerations: This work has not been published before; is not under consideration elsewhere; and has been approved by all authors.

**Table S1.** Propensity Score-Matching (PSM) matching balance

**Table S2.** The severity of COVID-19 disease based on WHO definition and classification among ACEI/ARB vs non-ACEI/ARB users based on WHO definition.

**Figure S1.** Propensity scores distribution (mirror diagram).

**Figure S2.** Love plot for the propensity score matching model-Covariates balance.

**Figure S3.** Love plot for IPSW-Covariates balance (A - Diabetes, hypertension or renal disease, B-hypertension and diabetes, C- Diabetes alone, D- Hypertension alone)

| **Table S1.** Propensity Score-Matching (PSM) matching balance | | | | | | | | | | |
| --- | --- | --- | --- | --- | --- | --- | --- | --- | --- | --- |
| **Confounders** | **ACEI/ARBs**  **(unmatched)**  **n=146** | | **Non-ACEI/ARB**  **(unmatched)**  **n=208** | **SMD* before matching** | | **ACEI/ARB**  **(matched)**  **n=145** | **Non-ACEI/ARB**  **(matched)**  **n=63** | | **SMD***  **after matching** | |
| Age (years), mean (±SD) | 56.36 (11.87) | | 40.29 (11.57) | 1.353 | | 56.46 (11.84) | 49.21 (12.54) | | -0.083 | |
| BMI (kg/m2), mean (±SD) | 28.81(6.32) | | 27.39 (7.35) | 0.224 | | 28.68 (6.13) | 29.22 (6.58) | | -0.229 | |
| Diabetes, n (%) | 98 (67.1) | | 42 (20.2) | 0.995 | | 97 (66.9) | 29 (46.0) | | 0.124 | |
| Hypertension,  N (%) | 123 (84.2) | | 22 (10.6) | 2.015 | | 122 (84.1) | 22 (34.9) | | 0.066 | |
| Renal disease,  n (%) | 17 (11.6) | | 9 (4.3) | 0.737 | | 17 (11.7) | 9 (14.3) | | 0.092 | |
| Number of Comorbidities¶, median (IQR) | 2 (2-3) | | 0 (0-1) | 1.217 | | 2 (2-3) | 1 (1-3) | | -0.061 | |
| Propensity score matching with age, BMI, diabetes, hypertension, renal disease and number of comorbidities  ¶Comorbidities include: diabetes, hypertension, cardiovascular disease (heart failure/coronary artery disease), stroke, renal disease, asthma and obesity  *Standardized mean difference  IQR: Interquartile range. SD: Standard deviation. SMD: Standardized mean difference: Angiotensin-converting enzyme inhibitors (ACE). ARB: Angiotensin II receptor blockers. BMI: body mass index | | | | | | | | | | |
| **Table S2.** The severity of COVID-19 disease based on WHO definition and classification among ACEI/ARB vs non-ACEI/ARB users based on WHO definition | | | | | | | | | |
| **Variable** | | ACEI/ARB  (matched)  n=145 | | | Non-ACEI/ARB  (matched)  n=63 | | | **P value*** | |
| WHO Severity Classification,  n (%) | |  | | |  | | | **<0.001** | |
| Mild-moderate | | 20 (13.8) | | | 33 (52.4) | | |  | |
| Severe | | 106 (73.1) | | | 24 (38.1) | | |  | |
| Critical | | 19 (13.1) | | | 6 (9.5) | | |  | |
| **Length of stay(days),**  median (IQR) | | 11 (7.0-17.0) | | | 9 (6.5-15) | | | 0.099 | |

* For count data fisher exact test was used. Non-parametric Mann Whitney test for length of stay.

Angiotensin-converting enzyme inhibitors (ACE). ARB: Angiotensin II receptor blockers. WHO: World health organization

**
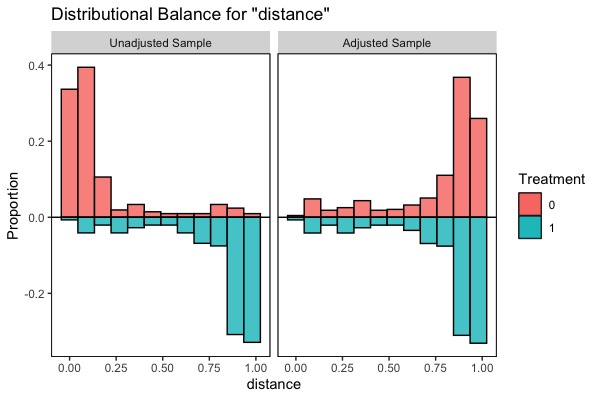
Figure S1.** Propensity scores distribution (mirror diagram).

0= Non-angiotensin-converting–enzyme inhibitors (ACEI) or angiotensin-receptor blockers (ARB) users; 1=ACEI/ ARB users

**Figure S2.** Love plot for the propensity score matching model-Covariates balance

**Figure S3.** Love plot for IPSW-Covariates balance (A - Diabetes, hypertension or renal disease, B-hypertension and diabetes, C- Diabetes alone, D- Hypertension alone)
